# Supplementary material for: Archaic introgression contributed to shape the adaptive modulation of angiogenesis and cardiovascular traits in human high-altitude populations from the Himalayas
Source: eLife. 2024 Nov 8;12:RP89815. doi: 10.7554/eLife.89815 (PMC11548878; doi:10.7554/eLife.89815)
Supplement: Supplementary file 1. — (a) Populations included in the extended dataset. (b) Single-nucleotide variants (SNVs) associated with values falling in top 5% of the distribution of likelihood ratio (LR) statistic calculated by VolcanoFinder. (c) SNVs associated with values falling in top 5% of the distribution of the LR statistic and comprised in the genomic region of the EPAS1 gene (i.e., 2:46474546–2:46663836). (d) SNVs associated with values falling in top 5% of the distribution of the LR statistic and comprised in the genomic region of the EGLN1 gene (i.e., 1:231449502–1:231608033). (e) Adaptive intregressed genes confirmed by VolcanoFinder and previous studies. (f) Gene networks including Denisovan-like derived alleles identified according to the Signet approach. [file elife-89815-supp1.xlsx]

## Sheet: supplementary file 1a
Population	Label	Country	Area	Source	N
Yakut	YKT	Siberia	East Asia	Li et al. 2009	25
Japanese in Tokyo	JPT	Japan	East Asia	Auton et al. 2015	105
Japanese	JPT	Japan	East Asia	Li et al. 2009	28
Koreans	KRS	Korea	East Asia	Landini et al. 2021	36
Xibo	XIB	China	East Asia	Li et al. 2009	9
Uygur	UYG	China	East Asia	Li et al. 2009	10
Oroqen	ORQ	China	East Asia	Li et al. 2009	9
Daur	DAR	China	East Asia	Li et al. 2009	9
Hezhen	HZH	China	East Asia	Li et al. 2009	9
Mongola	MNG	China	East Asia	Li et al. 2009	10
Han Chinese in Bejing	CHB	China	East Asia	Auton et al. 2015	112
Han	CHB	China	East Asia	Li et al. 2009	44
Tujia	TUJ	China	East Asia	Li et al. 2009	10
She	SHE	China	East Asia	Li et al. 2009	10
Miaozu	MIZ	China	East Asia	Li et al. 2009	10
Southern Han Chinese	CHS	China	East Asia	Auton et al. 2015	171
Tu	TU	China	East Asia	Li et al. 2009	10
Naxi	NAX	China	East Asia	Li et al. 2009	8
Yizu	YIZ	China	East Asia	Li et al. 2009	10
Lahu	LAH	China	East Asia	Li et al. 2009	8
Chinese Dai in Xishuangbanna	CDX	China	East Asia	Auton et al. 2015	93
Dai	DAI	China	East Asia	Li et al. 2009	10
Vietnamese	VTN	Vietnam	East Asia	Mörseburg et al. 2016	18
King in Ho Chi Minh City	VTN	Vietnam	East Asia	Auton et al. 2015	124
Vietnamese_Quang_Tri	VTN	Vietnam	East Asia	Landini et al. 2021	20
Cambodian	CMB	Cambodia	East Asia	Li et al. 2009	10
Malay	MLY	Singapore	East Asia	Mörseburg et al. 2016	25
Igorot	IGR	Kankanaey	East Asia	Mörseburg et al. 2016	22
Luz	LUZ	Philippines	East Asia	Mörseburg et al. 2016	16
Vizaya	VZY	Philippines	East Asia	Mörseburg et al. 2016	16
Dusadh	DSD	India	South Asia	Metspalu et al. 2011	10
Murut	MRT	Brunei	East Asia	Mörseburg et al. 2016	23
Sherpa_Khumjung	SHR	Nepal	Himalaya	Jeong et al. 2014	21
Sherpa_Rolwaling	SHR	Nepal	Himalaya	Gnecchi-Ruscone et al. 2017	30
Sherpa_Thame	SHR	Nepal	Himalaya	Jeong et al. 2014	22
Tibetans_Wang	TIB_W	Tibet	Himalaya	Wang et al. 2011	30
Tibetans_Mustang	TIB_M	Nepal	Himalaya	Jeong et al. 2018	22
Tibetans_Whole_Genome	TIB_WG	Nepal	Himalaya	Jeong et al. 2018	27

## Sheet: supplementary file 1b
Chromosome	SNP position	LR statistic	α
13	53078577	187.59	3.198e-05
13	53083759	177.127	3.17899e-05
13	53077080	172.527	3.19746e-05
13	53082648	145.19	3.19022e-05
13	53086890	72.2728	3.13566e-05
1	188850774	62.6367	0.000380337
8	58201357	61.3638	7.32757e-05
8	58200642	57.1271	7.39048e-05
8	141271075	56.9583	0.000985311
8	141271120	54.4254	0.00098272
8	111821496	53.9031	0.000354703
12	37861911	52.4811	6.84104e-06
12	37861889	52.4591	6.84095e-06
12	37863970	52.2836	6.93442e-06
12	37869030	51.211	6.96572e-06
12	28342358	49.952	0.000923062
12	37864005	49.9056	6.93456e-06
12	37868577	49.5564	6.96989e-06
4	30144216	49.4923	0.000778715
12	37864078	49.4561	6.93624e-06
4	172126689	49.1968	0.000565824
12	28342177	48.8015	0.000881357
12	37867775	48.5192	6.97607e-06
4	172126819	48.2734	0.000586898
4	172123366	46.8643	0.000413424
12	37867778	46.3008	6.97608e-06
1	188847514	46.2712	0.000342548
12	37872835	45.9852	6.88391e-06
12	28342119	45.7239	0.000859106
11	112269753	45.1178	0.000461842
12	37865276	44.5112	6.95093e-06
10	17889372	44.4129	3.32818e-05
4	63091765	44.399	0.000826784
3	45239344	44.201	0.000913381
20	44208011	43.9857	0.000410844
4	63087321	43.9772	0.000346641
20	44208000	43.3003	0.000410229
12	37872084	43.2558	6.90897e-06
6	55977935	42.6952	0.000459906
10	17881262	42.2143	3.3939e-05
13	52896873	41.8456	0.000205092
4	63087582	41.7991	0.000357124
10	17808880	41.1549	9.25781e-05
8	54513913	40.6149	0.00207864
2	81727482	40.5227	0.000301209
8	54513914	40.5029	0.00207728
10	59746075	40.2215	0.00148944
1	247977771	40.185	0.000435322
11	112257120	39.9207	0.00152202
8	54513843	39.8483	0.00214383
4	63087250	39.8397	0.00034246
2	24612586	39.1389	0.000297662
6	55977311	39.1061	0.000487666
4	63087189	39.0074	0.000337969
12	28339258	38.8694	0.000659339
13	52896517	37.8814	0.000200182
20	36337394	37.128	0.00113103
12	28339255	36.7414	0.000659466
1	188852565	36.3721	0.000339227
17	12915941	36.002	0.00314494
3	83911588	35.8488	0.00128287
12	113354384	35.7584	0.000876232
11	112257242	35.6072	0.00152694
20	36337196	35.3903	0.00116021
4	172151656	35.2051	0.00319234
4	172151657	35.1821	0.00319149
13	52897136	34.9093	0.000207901
3	111787197	34.7362	0.00149425
5	30617557	34.7023	0.000315187
16	8550012	34.5238	0.00305469
8	54517778	34.3644	0.00221607
8	82501560	34.0124	0.000454052
4	166867875	33.8543	0.00112521
14	57817808	33.7524	0.000729493
4	166049948	33.5289	0.00124107
4	53086848	33.4137	0.00171733
5	152970985	33.2541	0.000511903
6	55985113	33.2039	0.00198923
12	28339132	33.1614	0.000651833
3	111787230	33.0541	0.00149752
4	172151560	32.9057	0.003276
17	39833526	32.7843	0.000949298
3	83911345	32.7276	0.00141109
11	112256883	32.5567	0.0013907
11	112256879	32.2454	0.00138901
4	143886944	32.2371	0.000694392
20	53445871	32.1237	0.000535872
1	188847006	32.0961	0.00035408
6	101883656	31.6063	0.00087846
6	101883637	31.5827	0.000877915
14	57827961	31.4579	0.00142985
4	172119912	31.3089	0.000287967
18	333630	31.2149	0.000704777
11	55506548	30.9696	0.00251195
17	39705793	30.8788	0.000280675
8	28127107	30.5591	0.00251293
3	38344060	30.5147	0.00242678
5	30617242	30.468	0.000315444
1	235994867	30.3874	0.00139814
4	158850471	30.3302	0.000212592
2	81833923	30.0961	0.000579625
1	188788268	29.979	0.000970775
1	235994855	29.908	0.00139243
6	67916193	29.8331	0.00920462
12	28347354	29.7171	0.00442467
1	235992664	29.681	0.000699438
16	8543485	29.6272	0.00228224
1	235994908	29.614	0.00138661
1	235992644	29.5998	0.000700998
6	55993492	29.5522	0.00116541
4	158850550	29.542	0.00021297
19	6767749	29.4624	0.000200536
8	82518604	29.4395	0.00240896
6	55993457	29.3535	0.0011544
5	103627926	29.3408	0.00142287
6	55982461	29.228	0.000671741
8	79102028	29.0428	0.001855
5	30617938	28.7707	0.000310651
4	92281834	28.6712	0.0037253
10	129517656	28.6692	0.00147438
7	1484714	28.6691	0.000606303
7	136499165	28.6263	0.0028116
12	37868240	28.4448	6.97203e-06
4	166870779	28.4325	0.000532174
4	172150634	28.4116	0.00223653
8	79101997	28.3655	0.00186393
2	169912293	28.3588	0.00222153
2	169912292	28.3463	0.00222106
4	63088043	28.3369	0.000363074
7	97330336	28.3092	0.00133364
2	169912291	28.2379	0.00221804
13	87056843	28.2235	0.00138915
4	6053659	28.1575	0.000842658
5	23382599	28.1479	0.00358302
4	92281805	28.112	0.00373484
4	172150720	28.0964	0.00209774
1	188784817	28.0385	0.000399024
8	54517208	27.8825	0.00352651
14	91602024	27.8798	0.000408586
5	23407522	27.8376	0.00111597
17	62481801	27.8078	0.000674206
11	23237051	27.796	0.00191068
18	333739	27.7863	0.000719252
3	25976557	27.7142	0.000806547
4	135477692	27.675	0.00117567
5	23407612	27.5651	0.00110563
4	31699183	27.5046	0.000315817
16	8543364	27.4637	0.0022309
12	113362407	27.452	0.0047644
3	27879980	27.3475	0.00202528
2	24600285	27.3271	0.00100167
4	143895198	27.2917	0.00164339
17	8993972	27.2747	0.000879653
7	1457589	27.2391	0.000884742
1	235995280	27.2008	0.00143268
10	129517704	27.1631	0.00150203
3	25976157	27.1558	0.000786576
6	73234715	27.1188	0.000435987
2	81833947	27.099	0.00058009
1	188786684	27.0714	0.000670241
10	17889681	27.0351	3.30205e-05
19	56021864	27.0247	0.00275136
5	127917487	26.9954	0.00213755
20	53451682	26.9862	0.000283894
1	235993108	26.9821	0.000677466
17	63212699	26.9716	0.000919686
19	56021865	26.9616	0.00275122
19	50043275	26.9163	0.00303874
17	63212651	26.9087	0.000929216
1	188855157	26.8478	0.00188284
12	113362421	26.8319	0.00482808
8	54517371	26.7623	0.00335553
4	172138292	26.7553	0.00402685
17	12902109	26.754	0.00300995
6	55993585	26.7005	0.0011836
11	112325029	26.6826	0.00101471
1	188833500	26.6806	0.00227661
8	141268402	26.6792	0.00112497
12	37867478	26.6497	6.97352e-06
1	188786640	26.6016	0.000666092
7	1459338	26.5695	0.000523793
1	188784757	26.5428	0.000399392
19	56021854	26.423	0.00271881
15	47763312	26.374	0.00482976
11	113530592	26.3294	0.00118436
21	19270536	26.3252	0.00941577
8	141268434	26.2443	0.00111839
4	45696866	26.2419	0.000879757
5	128644509	26.1937	0.00463596
9	102048011	26.0944	0.00152641
4	172151820	26.0692	0.00340261
1	188833464	26.0591	0.00229877
7	140261487	26.0503	0.00150042
18	6971872	26.0442	0.000742723
8	28126501	26.0323	0.00443437
6	55982301	26.0007	0.000647913
1	188863815	25.9889	0.00254463
7	48707970	25.9861	0.00104794
4	18961510	25.8523	0.00136348
3	17577376	25.8512	0.00112496
1	247982487	25.8463	0.00125601
17	73247206	25.8148	0.000571996
21	19272566	25.7028	0.00253897
4	63110018	25.6718	0.00308945
21	17992375	25.6507	0.00108098
4	63110024	25.6486	0.00309629
4	143895167	25.6445	0.00167015
2	24589662	25.6315	0.00560348
2	24589647	25.6232	0.00557285
19	49211969	25.6189	0.0016531
14	91602033	25.5898	0.00040845
21	19270683	25.5714	0.0105385
7	140261334	25.5037	0.001421
7	1458931	25.4822	0.000613371
2	169912299	25.4633	0.00220751
10	126804565	25.4285	0.00326339
8	79100193	25.3523	0.00101031
21	17992367	25.309	0.00107749
8	141272750	25.2621	0.00346157
4	169129118	25.234	0.00524088
4	143867765	25.1619	0.000885935
8	28127609	25.1615	0.00245917
21	21450219	25.1485	0.0018163
5	162638596	25.1297	0.00417246
2	24600189	25.1241	0.00103027
8	79101898	25.1159	0.00180261
8	82518512	25.1075	0.00215533
6	55993653	25.0434	0.00117567
7	48707775	25.0411	0.00108343
12	59470536	25.0358	0.00140121
15	47763362	25.0356	0.00481236
4	63087458	24.982	0.000353961
6	73234827	24.9745	0.000434296
3	111793632	24.9158	0.00375521
18	76509956	24.9007	0.000914147
4	172139024	24.8785	0.00204514
12	127318280	24.8329	0.00137034
3	111793678	24.7723	0.00380108
1	113693396	24.7091	0.000414422
2	18668523	24.6813	0.000524597
3	38339943	24.6559	0.00253818
6	165798407	24.5952	0.00258195
3	38339947	24.5726	0.00254829
15	47763120	24.5591	0.00488746
10	17895613	24.5237	3.03486e-05
12	28339508	24.5152	0.000631047
19	49547139	24.5116	0.000913009
11	23237286	24.4996	0.00191366
4	43022222	24.4654	0.000652286
3	183006918	24.426	0.00120742
5	128652536	24.4029	0.0038775
3	26076713	24.3797	0.000884431
5	97235409	24.3508	0.00160191
7	140262443	24.3456	0.00257823
19	49547143	24.3173	0.000912677
2	24585646	24.3059	0.0014404
21	26760761	24.2793	0.000802543
17	9002850	24.2459	0.002519
17	9002849	24.2372	0.00252119
18	61435809	24.2124	0.00242208
14	92673028	24.2084	0.00227359
13	25030005	24.2063	0.00263813
10	17885203	24.1563	3.45192e-05
6	89460365	24.1522	0.00131518
14	57827505	24.1383	0.00166179
19	56515012	24.1238	0.00425377
10	126804550	24.1219	0.00327597
4	92281889	24.0934	0.00345417
18	65574113	24.0818	0.000338696
3	127594172	24.0436	0.0064293
7	108910634	24.0392	0.00191077
5	162638665	24.0301	0.0043431
10	11760956	24.0202	0.00394867
12	28602093	23.9987	0.000784736
15	47760923	23.9661	0.00165153
20	6025455	23.9603	0.00174125
10	87257727	23.9408	0.000865843
10	87257722	23.9291	0.000866408
5	128301586	23.9276	0.00323255
5	127917401	23.9062	0.00206071
3	183007015	23.876	0.00126571
12	37865136	23.8634	6.94807e-06
4	172139110	23.8446	0.00208196
7	108848601	23.8048	0.00198509
12	59461972	23.7697	0.00102415
9	10666676	23.728	0.0037273
14	92673181	23.7152	0.00218981
8	54517611	23.7025	0.00217628
6	96366426	23.7003	0.00159661
10	23890925	23.6781	0.00140348
2	81833625	23.626	0.000559412
2	24585688	23.6239	0.00143196
4	143867899	23.6206	0.000888141
9	120641280	23.6169	0.0028911
3	83915551	23.5679	0.00536715
7	48707690	23.5474	0.00110633
6	89460542	23.5241	0.00132546
3	50023067	23.5158	0.00152641
12	88700083	23.509	0.00078911
7	140259887	23.5024	0.000845785
11	25088584	23.4922	0.00184381
13	112564270	23.4676	0.00246327
19	49549009	23.4228	0.00234405
3	17577380	23.4131	0.00112454
7	6948880	23.4131	0.00193762
13	104387414	23.4094	0.00787594
3	50023063	23.3796	0.00153987
3	50023071	23.3771	0.00149458
7	108906663	23.3478	0.00569613
16	80692685	23.3363	0.00196376
16	54774171	23.3244	0.00397622
11	39949653	23.3223	0.000919259
5	128301885	23.3211	0.00419542
8	141268361	23.3199	0.00108646
5	34528278	23.3154	0.00797913
8	54517424	23.3074	0.00332686
19	49549003	23.2979	0.00233964
3	50023062	23.2767	0.00154088
3	175279236	23.25	0.00259235
1	236005898	23.2415	0.000897081
8	79100173	23.2397	0.00101136
3	175279239	23.2356	0.00259067
7	125358707	23.2206	0.00300138
15	58851684	23.2114	0.00393761
19	49547020	23.1921	0.000914576
8	134359273	23.1897	0.000653391
4	153184506	23.1528	0.00201344
5	100945332	23.1432	0.00903713
12	59462718	23.0271	0.00123979
11	26295022	22.9894	0.000248753
8	54515215	22.9758	0.00675398
4	30142822	22.9736	0.0008884
3	17646395	22.9712	0.00143388
2	169908254	22.9698	0.00482392
12	127319149	22.9272	0.00126622
21	17992422	22.9272	0.00107881
6	55987693	22.9087	0.00904429
8	82500962	22.9061	0.000438613
6	67916659	22.8891	0.00571468
17	39828495	22.8772	0.00388583
9	10666662	22.8573	0.00368671
6	67916652	22.8413	0.00567692
5	34528269	22.8154	0.00769919
12	34389711	22.8101	0.000187728
17	73247249	22.7711	0.000567237
16	17601297	22.7489	0.000906328
20	2558683	22.7467	0.0044195
10	90409342	22.743	0.0041714
6	55977027	22.7413	0.000462632
2	127721107	22.6989	0.00118658
8	74021818	22.6937	0.00767439
15	37055573	22.6819	0.00391809
17	39833756	22.6783	0.000944191
5	68055033	22.6422	0.00148758
5	128301971	22.6243	0.00448641
4	6061924	22.6113	0.00499057
2	187767744	22.6098	0.00473357
13	65558290	22.5951	0.00801598
6	16991695	22.5935	0.00172137
21	26754870	22.5837	0.00313154
10	129522896	22.5445	0.00256451
2	18668247	22.4999	0.000515386
5	30018230	22.4961	0.00269481
19	56022358	22.484	0.0061259
15	37055553	22.4704	0.00394695
8	54518324	22.4676	0.00561451
17	39858125	22.4591	0.00155427
4	172139159	22.4561	0.00208623
17	39858121	22.4471	0.00155647
2	107813966	22.4429	0.00155749
1	188865974	22.4374	0.00603134
20	10724406	22.4221	0.000765691
12	59457196	22.4159	0.000698649
5	34528301	22.4147	0.00887918
2	237527424	22.414	0.000895852
6	138702797	22.4065	0.00630034
8	24799742	22.3937	0.000740083
8	39947964	22.3585	0.00105685
4	63109972	22.3044	0.00302242
10	129497864	22.2931	0.0030188
13	112919941	22.2895	0.000807744
4	18991976	22.2628	0.00192823
16	8548295	22.2617	0.014548
11	111499933	22.2569	0.000421364
17	58631702	22.2567	0.000382703
11	21730277	22.2542	0.00149775
3	155031982	22.245	0.00144664
21	26754845	22.2216	0.00323331
2	24589718	22.2118	0.00580833
12	34389170	22.2105	0.000203173
2	158213658	22.1994	0.00157944
17	39825733	22.1986	0.00708783
2	81739485	22.1778	0.00283975
5	30583338	22.1537	0.00148054
17	39825722	22.1457	0.00693751
2	3617888	22.1296	0.000800725
2	81739435	22.1265	0.00280221
13	25028124	22.0948	0.0142492
4	153180870	22.0928	0.00424503
17	39836901	22.0815	0.00082231
1	188785417	22.0582	0.00045927
16	54772657	22.0569	0.00929577
6	55967702	22.0553	0.0077165
11	112261779	22.0534	0.00311267
8	57179659	22.0411	0.00207626
12	127320840	22.0302	0.00259837
12	34389155	22.0131	0.000201467
6	55932278	22.0082	0.00388876
4	63090350	22.0068	0.0010555
8	54514549	22.0018	0.00636762
4	135479705	21.9965	0.00181055
15	47763072	21.9922	0.00502187
8	54518373	21.9838	0.00566178
11	126720595	21.974	0.00394248
10	129524636	21.968	0.00117405
11	112254709	21.9663	0.00249218
6	67925370	21.9644	0.000746071
18	47882483	21.9546	0.00660066
6	55984277	21.9279	0.00159046
4	6062061	21.9223	0.00550755
11	26294937	21.9038	0.00024985
19	56026927	21.9035	0.00130211
5	175163053	21.898	0.00568638
3	176072227	21.8863	0.00153335
7	1460970	21.8862	0.000495473
4	20093148	21.8807	0.00230585
20	53226781	21.8799	0.0012118
7	140258000	21.8642	0.00119629
17	39863355	21.8554	0.000613293
9	115308439	21.8545	0.00652322
15	87741710	21.8507	0.0017536
18	24695462	21.8505	0.000572983
7	42461014	21.8412	0.000546007
8	74019555	21.8284	0.00337933
11	59547449	21.8094	0.00148919
10	23891240	21.8057	0.0016435
11	123472105	21.7929	0.00236678
3	487548	21.7834	0.00363753
4	20096425	21.7829	0.00452391
9	749472	21.7828	0.00155234
9	10106367	21.7794	0.00590226
12	8806610	21.779	0.00164684
9	123026915	21.7699	0.00261721
9	123043456	21.765	0.00072547
1	27468019	21.74	0.000632597
4	26568223	21.7336	0.00152012
10	121861338	21.7253	0.00276836
10	3316031	21.7218	0.0080908
4	45663396	21.7102	0.00291879
10	33811492	21.7085	0.00138483
15	88979742	21.7057	0.000531844
2	81663140	21.7011	0.00201351
4	176010065	21.6973	0.00103391
20	53226678	21.6901	0.0013109
4	127256427	21.6842	0.00436527
13	23795721	21.684	0.00477488
1	188865926	21.6775	0.00621193
5	103621253	21.6602	0.00164461
12	59464453	21.6547	0.00211839
19	37611709	21.6274	0.00118425
4	53087105	21.6263	0.00165092
10	2098681	21.6017	0.00702995
6	73219841	21.5966	0.00795117
6	1178066	21.5952	0.000914814
10	3316034	21.5835	0.00810938
17	39699814	21.5727	0.000326309
4	20096275	21.5584	0.00501078
4	153184528	21.5569	0.00200688
9	10667262	21.5515	0.0073269
11	94660325	21.5001	0.00581171
1	7353571	21.4905	0.00173888
16	80689218	21.4887	0.00436774
3	83915405	21.4779	0.00682286
4	169128528	21.4767	0.00273973
9	749493	21.4736	0.00158235
13	23795767	21.468	0.00469206
1	188866050	21.4526	0.0056265
3	45236167	21.4421	0.00197214
11	94613916	21.4361	0.000609153
5	116513359	21.4184	0.00121602
2	81729040	21.4133	0.000298187
3	31299834	21.4045	0.00270016
4	169128513	21.4039	0.00276753
3	173606933	21.3972	0.00133545
11	94660310	21.3952	0.00580101
3	36878563	21.378	0.000739931
7	140257907	21.369	0.0012601
11	113522020	21.368	0.0019853
15	58851677	21.3626	0.00392387
16	64816738	21.3624	0.0014006
12	127319476	21.3522	0.00136123
8	79098976	21.3306	0.00599913
4	30142776	21.3298	0.0008897
2	16611452	21.3228	0.00237576
11	42096327	21.3165	0.00117194
4	7506800	21.3013	0.00175443
2	81737950	21.2947	0.00168837
16	16110101	21.2706	0.00168676
9	24702670	21.2639	0.000527867
9	91255143	21.2552	0.000928396
7	108917378	21.2533	0.00231426
3	105994957	21.2433	0.00576594
8	57179633	21.229	0.00218266
6	89525817	21.2239	0.000874047
10	23891271	21.2119	0.00167389
2	19267106	21.2003	0.000874636
2	158214351	21.199	0.00238149
11	112261760	21.1822	0.00313443
16	17593300	21.1475	0.00199153
17	39828512	21.1469	0.00411391
7	49202075	21.1382	0.00264667
13	38803557	21.1339	0.000786154
21	21846258	21.1307	0.0066014
9	115308389	21.115	0.00659778
13	106272176	21.1144	0.002533
4	172152196	21.0967	0.00841342
16	17596475	21.0872	0.00043337
12	8806554	21.0856	0.00165343
11	21730348	21.0845	0.00152949
9	125450087	21.0833	0.000382641
12	113377822	21.0824	0.00318345
2	24594257	21.0785	0.00428715
12	49746245	21.0669	0.00127588
17	73247103	21.0587	0.000577439
7	108878776	21.0402	0.000956687
16	17591490	21.0398	0.00110634
4	172149811	21.0386	0.00280795
15	47770710	21.0099	0.000802397
2	188931799	21.0007	0.00126655
16	64816720	20.9988	0.00139786
9	123041214	20.9909	0.00141676
4	86066820	20.9806	0.00305966
8	74017948	20.9668	0.00647062
7	108842290	20.9634	0.00138233
9	115310703	20.9557	0.0033399
2	188931666	20.9544	0.00128194
4	166863316	20.9458	0.00654722
10	10957340	20.9385	0.00749299
12	60086206	20.9152	0.000454528
9	26021856	20.911	0.00285743
19	6016436	20.9102	0.00119478
3	105948890	20.9079	0.00400482
9	120641350	20.8834	0.00246394
4	30113279	20.8702	0.00152492
10	66182859	20.8685	0.00111611
4	166863671	20.8642	0.00388249
2	188931801	20.8631	0.0012661
7	79429196	20.8614	0.00166945
5	29999021	20.8581	0.00298329
19	49549055	20.8581	0.0024088
17	62491086	20.8571	0.00254524
8	54515435	20.8399	0.0130769
16	22969661	20.8287	0.00546859
4	185584441	20.8257	0.000723243
7	108917217	20.7824	0.00272789
1	27477567	20.7814	0.00201009
4	97435017	20.7801	0.00615854
3	183007021	20.7799	0.00126703
5	23381257	20.7781	0.0111176
2	121252829	20.7736	0.0033688
8	127052404	20.7687	0.00405159
2	24596488	20.7614	0.0103448
10	134429944	20.7559	0.00193298
17	40951332	20.7521	0.000784511
5	108291463	20.7505	0.00125698
15	58849606	20.7457	0.00215711
13	25027697	20.7299	0.00620548
17	62490551	20.7246	0.00225019
12	127320817	20.7152	0.00261495
2	228576492	20.7143	0.00164796
10	11107924	20.7129	0.00215874
12	40823493	20.71	0.00828786
4	18966569	20.7067	0.00177858
12	34389707	20.6855	0.000188016
8	127935229	20.666	0.00688884
2	121252848	20.6605	0.00337757
7	79429063	20.6545	0.00174146
3	175278049	20.6365	0.00311
10	11107938	20.628	0.00216813
1	27477549	20.6227	0.00201664
2	158213285	20.6204	0.00146091
4	6061295	20.6194	0.00283696
11	40565909	20.5991	0.00260946
7	1461066	20.598	0.000497186
20	43790872	20.598	0.00132403
20	61500984	20.5959	0.00353756
4	185637699	20.5928	0.00328802
2	81738001	20.586	0.00165471
1	192952798	20.5841	0.00127924
5	82213851	20.573	0.00472014
21	19269068	20.5424	0.00368926
7	49195695	20.5422	0.00184954
19	6804820	20.5127	0.00164371
12	113374748	20.491	0.00265211
15	76413635	20.468	0.00229094
9	32002358	20.4473	0.00435425
9	26021882	20.44	0.00284638
13	112911262	20.4347	0.00473755
8	127052418	20.4248	0.0040407
8	127051228	20.4242	0.00306672
4	86056285	20.4183	0.000396721
7	109808331	20.4091	0.000320325
20	2619053	20.3966	0.00316841
1	237230990	20.3931	0.00441343
2	18345842	20.3825	0.00236565
8	54513287	20.3676	0.00304584
4	158879090	20.367	0.0108959
11	42096153	20.3618	0.00106142
1	223389965	20.359	0.000892723
8	127045555	20.3583	0.000814448
8	120232502	20.3422	0.00170273
12	8799906	20.3378	0.00158353
16	75496488	20.3344	0.00379885
3	45236187	20.3338	0.00191846
10	66129747	20.3217	0.0011982
2	187767745	20.3174	0.00473995
2	24594274	20.2912	0.0042949
16	80692773	20.2765	0.00164696
19	6800779	20.2719	0.00422197
16	17895012	20.2452	0.0046332
4	185619282	20.2441	0.00418526
4	92289339	20.234	0.000753045
2	237762695	20.2336	0.00206656
1	7355170	20.2313	0.0012336
3	26076008	20.2233	0.000947942
14	92671063	20.213	0.00127823
10	121858440	20.2058	0.00340528
5	23381263	20.1845	0.011257
11	132698150	20.1804	0.00443391
11	23237399	20.1729	0.00186587
16	23224698	20.1697	0.00228651
3	127599818	20.1661	0.00119649
2	72289902	20.1597	0.000439845
13	41478232	20.1553	0.000378071
4	98505438	20.1552	0.000933508
9	120637970	20.1475	0.00480458
8	92415912	20.1405	0.00140803
17	63211288	20.1334	0.00228782
6	89450262	20.1247	0.000884695
11	132698148	20.1212	0.00444433
12	49746325	20.1176	0.00127682
20	43922960	20.1147	0.00214636
18	68158754	20.1144	0.00271568
10	134125750	20.1106	0.00276497
17	37101779	20.1101	0.00116128
3	17781780	20.0902	0.00145024
6	89524164	20.0855	0.000772045
3	176072205	20.0813	0.00152612
3	173607637	20.0749	0.00176675
6	55982597	20.0704	0.000684072
11	111495779	20.0702	0.000892439
11	129885550	20.0653	0.00137726
12	49737114	20.0651	0.000955414
12	113366691	20.0628	0.00476512
2	178414641	20.0587	0.00122993
1	247345819	20.0552	0.0108952
13	112911307	20.0526	0.00469484
2	187695384	20.0427	0.00682983
18	47882489	20.0406	0.00672777
13	25027745	20.0347	0.00656455
1	109738589	20.034	0.00704095
2	106362287	20.0323	0.00186936
11	112254081	20.025	0.00451143
1	238250151	20.0238	0.00517723
10	2098677	20.0183	0.00705053
6	89353813	20.017	0.00118149
20	53430323	20.0151	0.010811
8	120232472	20.0111	0.00172672
4	185604461	20.006	0.00144258
4	34750019	20.0019	0.00146068
6	49311235	19.9982	0.00339308
3	125141272	19.9878	0.00186225
7	48732786	19.9816	0.00622009
12	67530871	19.9709	0.000912041
15	47763816	19.9482	0.00833225
3	2698276	19.9422	0.0032626
3	17441588	19.9417	0.00146252
14	70593777	19.9369	0.00149172
2	158205221	19.9345	0.0019695
1	223389870	19.9331	0.000908315
7	140263174	19.9276	0.0040858
18	2203651	19.9246	0.00480357
18	68158783	19.911	0.00271827
9	26018837	19.9071	0.00588666
2	16615530	19.8972	0.00277429
17	39691412	19.8964	0.000853172
3	2698291	19.8879	0.00328288
3	131545989	19.8775	0.00271928
12	3111780	19.8704	0.00125309
18	4831248	19.8631	0.00241557
16	74753919	19.8583	0.00119439
2	24589468	19.856	0.0209059
4	185638231	19.8508	0.00514472
15	88971907	19.8448	0.00255373
19	6800694	19.8447	0.00411852
3	155036817	19.8361	0.00454303
6	49311216	19.8295	0.00339284
6	89491198	19.8271	0.00226145
8	54516629	19.8225	0.00569665
6	89491199	19.809	0.00226154
4	165896254	19.8062	7.19636e-05
3	175279124	19.8041	0.00237565
4	6061246	19.8006	0.00267103
4	6056379	19.7982	0.00113835
20	2142160	19.793	0.00564395
1	27485068	19.7917	0.000695226
10	82209672	19.7889	0.000811287
6	67916696	19.7868	0.00594161
7	76718621	19.7838	0.00475786
10	23880923	19.7811	0.000815798
20	2142148	19.7806	0.00563085
6	67913195	19.7455	0.00523512
5	150940750	19.7416	0.00843882
1	223392868	19.7392	0.000637569
2	202387035	19.739	0.00179993
3	105994840	19.7322	0.00710157
11	112256294	19.732	0.00592273
10	123744879	19.7304	0.00403418
7	79507315	19.7283	0.00479547
21	17702532	19.7199	0.000580973
8	54518420	19.7143	0.0057397
10	10954885	19.7049	0.00290953
4	172139199	19.7035	0.00226742
16	17480929	19.6926	0.000998585
7	108847364	19.6918	0.005668
1	238241448	19.674	0.00817518
13	41478273	19.665	0.000375392
17	39691099	19.6612	0.000895522
10	26516517	19.6462	0.00196567
7	108942471	19.643	0.00158622
4	18966280	19.6425	0.0120313
14	88806434	19.6343	0.00275738
5	29998994	19.6254	0.0029043
2	24593948	19.6202	0.00496716
6	1437933	19.6094	0.000362086
17	62491160	19.6092	0.00266574
7	108942491	19.601	0.00158762
10	56487448	19.5968	0.00932021
5	97245100	19.5966	0.00333524
17	39679804	19.5832	0.00334905
11	24878184	19.5831	0.00871581
14	69656923	19.5819	0.000488692
10	134451366	19.5767	0.00189041
16	8542148	19.576	0.00946028
1	238268708	19.5718	0.00651596
3	176072228	19.57	0.00153315
3	36878970	19.5655	0.000733093
20	50729783	19.5608	0.00211145
13	19925237	19.5551	0.00719728
1	247986774	19.546	0.00510099
2	24593895	19.5423	0.00532465
1	113699538	19.5284	0.00123949
6	67916580	19.5165	0.00504413
9	26018811	19.5161	0.00613183
4	102871182	19.5082	0.00215375
8	141277447	19.5013	0.00649879
18	55694157	19.499	0.000508882
9	32002469	19.488	0.00387709
21	17990995	19.4708	0.0023232
12	28330038	19.4635	0.00210517
13	113654289	19.4492	0.0123661
2	24589528	19.444	0.00602057
1	214875019	19.4379	0.00622562
5	103634425	19.433	0.000857471
6	66549325	19.4323	0.00279305
8	54533593	19.4231	0.00132093
16	13008807	19.3973	0.00422245
4	53088516	19.3931	0.00690489
1	214875024	19.3814	0.00618289
12	113375036	19.3805	0.00265729
3	31299775	19.3792	0.00278614
1	237230602	19.3781	0.0103256
11	126724364	19.3716	0.00177459
8	74023438	19.3599	0.00450551
17	62485729	19.3596	0.00120541
6	55912335	19.3493	0.00142827
16	64818829	19.344	0.00223045
14	50136268	19.3345	0.000819313
14	50120283	19.333	0.0010805
6	5010031	19.3315	0.0016361
7	108906355	19.3276	0.00527002
3	175305939	19.3259	0.00122558
3	155038510	19.3252	0.00173082
10	133862022	19.3235	0.00256269
20	43921742	19.3186	0.00353231
4	143894051	19.3176	0.00552995
11	114394234	19.3164	0.00153484
21	17024813	19.3162	0.00166955
5	128300994	19.316	0.00546095
8	20586107	19.313	0.00443459
3	17788866	19.3086	0.00108204
17	49944348	19.3039	0.00151822
8	79089754	19.2918	0.00315251
16	17480526	19.2824	0.000878636
1	208125926	19.2811	0.00295441
10	10956772	19.28	0.00272361
6	16993162	19.2726	0.00158956
7	31176104	19.272	0.00758381
2	228710455	19.2685	0.00272161
3	36878086	19.2659	0.000745018
1	247952306	19.2645	0.000521467
4	6056348	19.2581	0.00114356
6	67913124	19.2481	0.0050398
13	65557912	19.2409	0.00889548
9	4250359	19.2404	0.00199269
20	2558333	19.2398	0.00747835
16	17596384	19.2357	0.000434575
6	19901485	19.2354	0.00795705
8	127051695	19.227	0.00770005
1	113699640	19.2244	0.00125078
8	79100241	19.2186	0.00100184
12	28352726	19.2109	0.00173641
2	237526916	19.2064	0.000913824
5	128301174	19.2046	0.00391711
1	188780305	19.203	0.00078564
4	45690433	19.2012	0.00203443
17	12588799	19.1926	0.00104909
6	55988932	19.1904	0.0066811
3	183011072	19.1868	0.0118271
1	113706410	19.1797	0.00441709
11	30108423	19.1738	0.000452779
4	185596319	19.1724	0.00100461
7	79511253	19.1641	0.00117266
10	2098466	19.1618	0.00803092
5	175163573	19.1615	0.00410649
20	4432967	19.155	0.000779092
13	106272241	19.1458	0.00256631
10	56485871	19.1434	0.00429553
1	214268891	19.1264	0.000995268
4	143894091	19.1246	0.00533415
7	9916410	19.1216	0.012724
4	59280374	19.116	0.00754429
17	62479915	19.1147	0.00128466
6	9191851	19.1095	0.000516929
10	59743573	19.1034	0.0170462
11	112253113	19.1003	0.000787868
16	13008814	19.0996	0.00406504
21	42580851	19.0946	0.00807358
10	129506994	19.0917	0.00249762
16	61263104	19.0908	0.00181042
13	20237577	19.0867	0.00156639
21	16154913	19.0795	0.00491624
3	183014482	19.0741	0.0012766
4	53088527	19.071	0.0069372
1	113699587	19.0701	0.00126275
3	176071640	19.0645	0.00721941
8	35481385	19.0607	0.00176897
10	10956834	19.059	0.00297544
16	25999290	19.0503	0.00271683
9	36730774	19.0484	0.00165866
13	20237727	19.047	0.00153107
14	42541427	19.0462	0.00377067
2	197996500	19.0426	0.000689267
19	12172004	19.0399	0.00177107
16	8542446	19.0347	0.0049972
12	49737201	19.0299	0.00097734
13	64332575	19.0235	0.000404675
18	65588060	19.0209	0.00253014
15	38004515	19.0186	0.00452562
7	42441703	19.0172	0.000615058
6	49322997	19.0141	0.00157294
5	127899313	19.0118	0.00107122
10	123751602	19.0089	0.001259
5	156443895	19.0048	0.00264684
6	55992744	19.0024	0.00441215
4	63094009	19.0021	0.0015488
4	115670097	19.0019	0.0122739
2	975129	19.0015	0.00816142
6	32750346	18.999	0.0222526
7	9916389	18.991	0.0132883
10	3322625	18.9901	0.000837872
8	127052333	18.9873	0.00411502
13	53252726	18.9837	0.00354008
17	64178142	18.9757	0.00186571
1	188793472	18.968	0.00673934
3	45236163	18.9608	0.00197616
4	166863361	18.9558	0.00633872
12	67530971	18.9495	0.000915516
10	5168198	18.9403	0.00407627
5	128309265	18.9374	0.015626
10	133862007	18.9364	0.00253134
20	43919704	18.9352	0.00464159
1	98505171	18.9327	0.00113583
4	45690380	18.9271	0.00208732
21	21846259	18.9219	0.00661022
13	52946739	18.9189	0.00207369
4	158880406	18.9127	0.00317482
8	24724313	18.9099	0.00428426
10	82209592	18.9082	0.000796743
4	6948950	18.9053	0.00203667
7	42422710	18.8967	0.00520464
11	59523385	18.8925	0.00234506
3	76418324	18.8857	0.00069017
2	158215604	18.8793	0.0032131
20	44191847	18.8791	0.00179796
20	57435532	18.8779	0.000692855
16	23225041	18.8755	0.00227633
4	35402330	18.8722	0.00752928
19	54736517	18.8701	0.0082508
16	64786573	18.8668	0.0020843
16	17594089	18.8602	0.00431838
8	127051203	18.8522	0.00324041
18	65592880	18.8503	0.00425049
12	127319662	18.8475	0.00152436
2	229519992	18.8408	0.0014649
10	5168200	18.84	0.00408896
8	111833771	18.8369	0.00661322
17	64178205	18.8315	0.00187294
5	9996327	18.8241	0.00476444
3	17788430	18.824	0.00111797
7	152625845	18.8213	0.00142953
9	75427824	18.8212	0.0018483
4	35402338	18.8132	0.00752622
8	129531566	18.812	0.00315202
12	113349833	18.8036	0.000362244
4	166861578	18.7992	0.00605449
9	95154082	18.7978	0.00111421
2	16615509	18.793	0.00283404
5	23408401	18.7901	0.00133704
10	23860231	18.7868	0.00447397
8	141278292	18.7863	0.00365298
4	30113453	18.7784	0.00166654
10	26519599	18.7777	0.00361129
2	18681597	18.7735	0.00609086
18	63386511	18.7723	0.00154123
7	131524905	18.7694	0.00381457
7	108890985	18.7669	0.00195716
12	8799500	18.7595	0.00142388
2	18680946	18.7457	0.014885
7	42587813	18.7386	0.00335405
5	26793462	18.736	0.00581877
21	16156047	18.733	0.00277519
9	125150427	18.7316	0.0014218
1	192677326	18.7243	0.00592295
12	113357193	18.7236	0.00195695
6	149516369	18.7232	0.00389538
3	127599798	18.7193	0.0011963
6	16992798	18.7189	0.00179612
6	74850259	18.7155	0.00336642
2	210135082	18.7104	0.00197498
8	111908928	18.7072	0.000736579
13	25065181	18.7045	0.00271002
11	111500026	18.7042	0.000417986
10	23880631	18.7042	0.000922597
4	117522293	18.7016	0.00219728
6	55991690	18.701	0.00139714
1	235031407	18.6942	0.00719424
17	34375561	18.6886	0.00219071
8	53894673	18.6858	0.00561109
2	187691857	18.6828	0.00328368
4	166861897	18.6796	0.00655822
6	65828853	18.6741	0.00329145
4	53091752	18.6717	0.00283019
16	80691749	18.6702	0.0051246
6	49299705	18.6656	0.00297656
6	49336121	18.6536	0.00559464
3	140521064	18.6431	0.00584837
8	58200173	18.6392	7.41733e-05
11	39340566	18.6385	0.00249614
20	44208220	18.638	0.000414923
11	111532473	18.6377	0.0015163
5	108355077	18.6327	0.00227981
1	235031457	18.6302	0.00666252
7	36069846	18.6276	0.0052885
11	121635809	18.6177	0.000665876
2	24589856	18.6159	0.0103044
15	42639414	18.6149	0.0069575
8	102924970	18.6141	0.0015713
4	117322547	18.6113	0.00695904
18	57651188	18.5997	0.00192839
12	87465497	18.5987	0.00348713
12	79133647	18.5858	0.000978352
12	71897264	18.5834	0.00529609
4	115670099	18.5774	0.0119081
18	63386454	18.5668	0.00157344
20	43919745	18.563	0.00479436
11	39338546	18.5586	0.00111831
16	23224517	18.557	0.0024403
14	92671089	18.5523	0.00127973
7	140846275	18.5516	0.00434849
11	27272836	18.5482	0.0027177
7	48706344	18.5468	0.00304678
17	12907909	18.5459	0.00199023
17	39690992	18.5441	0.000935162
13	29044976	18.5393	0.00160834
4	184887696	18.5384	0.00133136
15	38005364	18.5368	0.00313375
13	23795480	18.536	0.00692441
8	141177627	18.5352	0.0061909
6	85883690	18.5347	0.00640145
6	40302964	18.5343	0.00367058
13	73297579	18.5341	0.00134847
15	79288184	18.5268	0.012717
20	41236837	18.524	0.00248168
1	188825908	18.5191	0.0057435
1	93298756	18.515	0.00161585
2	187694952	18.5123	0.00276891
4	29797286	18.5113	0.00439114
1	109456180	18.5091	0.00291205
6	55993174	18.5078	0.0126467
1	109456181	18.5052	0.00291028
21	21822056	18.5008	0.00641499
2	158959754	18.5006	0.00515916
15	38005374	18.4994	0.00315176
12	59471178	18.4976	0.00139615
13	53218248	18.4962	0.00358621
10	87242681	18.4921	0.0019288
17	37102049	18.4891	0.00109081
4	166869307	18.4879	0.000844818
13	20456975	18.4854	0.00247162
3	83916372	18.4796	0.00330158
5	151645831	18.4666	0.00764736
20	11583147	18.4613	0.00273551
2	81837583	18.4574	0.000944328
6	102605326	18.4502	0.00722856
9	3011890	18.4223	0.00720571
19	50044107	18.407	0.00351803
8	92417267	18.4021	0.00258762
19	4748906	18.4002	0.00290826
1	7355210	18.3968	0.00132217
6	85883734	18.3953	0.00664155
1	97490921	18.3944	0.00192345
16	17595287	18.3937	0.00347792
4	29646560	18.3886	0.00182116
2	127534877	18.3835	0.000986504
2	229519988	18.3812	0.00146317
19	49207257	18.3811	0.0117182
14	65230358	18.3789	0.00124836
19	49207255	18.3752	0.0116979
8	72957612	18.3709	0.00216788
12	54859617	18.3684	0.0028993
17	74485480	18.366	0.00283225
10	56473373	18.364	0.00314699
3	45068074	18.3637	0.00188926
8	52499274	18.3577	0.0018432
18	11894699	18.3573	0.00575335
10	92898989	18.3541	0.00413128
7	42430237	18.3515	0.0245115
6	74850240	18.3512	0.00339576
4	185604508	18.3421	0.00144054
16	64809704	18.3405	0.00210903
10	10956630	18.3357	0.0027366
7	42430236	18.3352	0.0245213
4	153182289	18.3328	0.0083693
8	105582157	18.3318	0.00096782
18	68158152	18.3318	0.00244079
11	42094718	18.3252	0.00225696
11	94670322	18.3203	0.00295441
1	27502538	18.3178	0.00278757
14	65230317	18.3124	0.00123716
12	28345884	18.3065	0.0107089
5	105397669	18.3056	0.00106593
6	73219047	18.2991	0.0165793
17	63211340	18.299	0.00248055
20	53430286	18.2963	0.0121328
1	238837273	18.2897	0.00216999
11	126711270	18.2819	0.00144596
6	73221640	18.2784	0.00284723
2	136936468	18.2723	0.00345523
12	59465715	18.269	0.00571853
7	49208431	18.2654	0.00219721
4	31717375	18.2622	0.00151286
10	59744545	18.259	0.004672
1	89160461	18.2531	0.000982703
12	54859645	18.246	0.00293366
18	47605379	18.2401	0.00126637
1	185693477	18.2347	0.00320539
4	18966603	18.2337	0.00171734
4	189120967	18.2333	0.00183301
1	235028557	18.231	0.00206145
2	225273431	18.2307	0.0044443
10	133844711	18.2297	0.00524867
15	35113906	18.2266	0.00282332
12	59466080	18.2246	0.00982728
4	43090697	18.2229	0.00233137
12	59472245	18.2228	0.000985634
4	18966543	18.2203	0.00178842
11	59547323	18.2169	0.00141614
11	42014203	18.2129	0.00444722
8	24724944	18.2128	0.00428699
5	4485808	18.2126	0.00362685
4	63111664	18.2048	0.00169776
9	91279962	18.2043	0.00102389
6	70303093	18.1983	0.00364733
8	35481370	18.1969	0.00249185
8	57178744	18.1946	0.00343399
3	17789074	18.1916	0.00109657
9	123039329	18.1854	0.00276116
3	31308786	18.1836	0.00160378
1	188865567	18.1821	0.010453
12	28363185	18.1794	0.00779212
7	42528802	18.1756	0.00207578
6	85883293	18.1752	0.0120846
3	105953890	18.169	0.0013785
12	113357209	18.1636	0.0019358
5	127922958	18.1628	0.0015569
2	24588256	18.1613	0.00479282
1	238271044	18.1588	0.00240969
12	59571881	18.1581	0.00352175
12	28363187	18.1503	0.00782688
10	90408801	18.1496	0.00663895
18	68159472	18.1422	0.00550753
8	28141291	18.1419	0.0056101
16	31295075	18.1362	0.00110837
6	16993706	18.1324	0.00129772
8	54516605	18.1274	0.00583657
6	65827714	18.125	0.00509147
3	51728037	18.1237	0.000921911
7	79446581	18.1216	0.00304266
16	13012887	18.1214	0.00470042
3	38343495	18.1202	0.00668658
17	39825446	18.1185	0.0135742
2	28479707	18.1176	0.00109822
3	76415441	18.1159	0.00100331
16	17595061	18.1149	0.00318544
8	141178451	18.1115	0.00330348
5	4485755	18.1083	0.00359363
6	105531936	18.1076	0.000565989
4	58165730	18.1026	0.00383601
7	29774120	18.0947	0.00290803
2	178432953	18.0919	0.00282905
7	5753101	18.0902	0.00348592
8	54510848	18.0843	0.024487
11	39342375	18.0816	0.0091653
4	143893597	18.0804	0.00586787
5	175162636	18.0801	0.0114852
2	31502932	18.08	0.00186422
16	17895007	18.0795	0.00462428
17	64176561	18.0762	0.00259606
14	50120149	18.0738	0.00101591
11	55506201	18.0733	0.0029824
5	163933160	18.0683	0.00394698
6	55993156	18.0646	0.0129387
17	12907892	18.0644	0.0019738
1	98505035	18.0619	0.00114761
10	133844706	18.0584	0.00528775
2	158959768	18.0545	0.00533686
1	247986129	18.0517	0.0158672
2	24593977	18.0499	0.00493789
16	17484444	18.0473	0.00131993
8	57178720	18.0425	0.00343623
7	7398480	18.0382	0.00352009
7	140846230	18.0348	0.00439249
16	54774483	18.027	0.00545617
17	39676412	18.0253	0.00255728
7	108460522	18.0251	0.00110044
2	169912236	18.0246	0.00206395
12	132523490	18.0245	0.00126963
8	111977315	18.0089	0.00117989
5	23383010	18.0043	0.00332518
21	21847182	18.0038	0.0381556
17	6335863	18.0008	0.00568437
9	10106733	17.9997	0.0115375
1	185693475	17.9995	0.00317206
4	185619281	17.9985	0.0041883
16	17595354	17.9978	0.00399475
9	10668647	17.996	0.00898558
20	44222697	17.9956	0.00227373
3	175278289	17.9917	0.00426217
6	16994178	17.9901	0.00308882
16	80691624	17.9895	0.00556924
6	55988047	17.9833	0.025111
1	188834822	17.9796	0.00393701
5	119395102	17.9731	0.0064671
5	128288950	17.9728	0.0109426
1	238251987	17.9714	0.00435579
11	130208659	17.9694	0.00437689
8	33301934	17.9676	0.0116645
3	155036426	17.9641	0.0191632
9	8756055	17.9555	0.0118919
6	163738606	17.9496	0.00422189
16	75497626	17.9486	0.0365024
5	150940783	17.9362	0.00774817
10	26596983	17.9158	0.00258895
13	25064654	17.9109	0.00641093
15	91847198	17.9053	0.00324559
4	117354453	17.9025	0.00259363
8	54515957	17.8937	0.0217334
14	79763373	17.8919	0.00461776
8	141273222	17.8905	0.00942802
6	32750369	17.8805	0.021958
5	54930617	17.8757	0.00209351
9	10110768	17.8739	0.00183395
5	152960319	17.8723	0.00520294
5	119395095	17.8719	0.0064965
15	47784433	17.8702	0.0014727
19	56023287	17.8698	0.0138521
17	2330716	17.8678	0.000457334
5	97227347	17.8675	0.00302951
8	54515955	17.8654	0.0218198
8	24795204	17.8641	0.00548956
13	48144175	17.8625	0.00220516
4	117323524	17.8609	0.00996222
14	58936513	17.8597	0.0033243
11	42013416	17.8592	0.00216803
3	83914442	17.8531	0.0119799
19	37605688	17.8452	0.00742115
3	131538290	17.8431	0.00874641
4	139847702	17.8421	0.0073134
3	31309957	17.8389	0.00100116
15	47784432	17.8367	0.00147171
2	136936567	17.8349	0.0030684
13	104386904	17.8336	0.00618841
4	101769524	17.8286	0.00160229
21	26753186	17.8235	0.00723327
14	99086334	17.8121	0.00374349
3	82953575	17.8113	0.00277016
9	115210864	17.8032	0.00299866
6	49299008	17.8032	0.00631492
2	34960739	17.8023	0.00285217
7	151621071	17.802	0.00205799
10	22968213	17.8	0.00223359
4	26568719	17.8	0.00159304
9	38632374	17.7976	0.00471761
8	17424080	17.796	0.00453827
3	76410396	17.7945	0.00632447
6	56533651	17.7893	0.00106781
2	49821976	17.7856	0.000830048
3	8275035	17.7842	0.00889248
1	238836676	17.782	0.00148057
3	76410395	17.7787	0.00632718
7	36069954	17.7775	0.00534809
5	5666487	17.7757	0.00107682
19	49208543	17.7752	0.00496115
19	49190765	17.7719	0.000290016
10	37810694	17.7715	0.00229955
16	8535934	17.7689	0.000559776
2	69506944	17.7684	0.0015538
11	83620579	17.7672	0.00982135
8	24795205	17.7671	0.00548741
1	100461046	17.7651	0.00215223
11	20721789	17.7642	0.0113286
4	143812605	17.7625	0.00307996
14	70593784	17.7618	0.00148941
14	99086336	17.7599	0.00374715
7	37281797	17.7585	0.00119999
12	54858394	17.7567	0.00119036
4	117324233	17.7562	0.00445308
1	247979849	17.7504	0.000840025
7	18851525	17.7486	0.00115378
10	129501514	17.7462	0.00189151
6	16996108	17.7431	0.00144327
1	238250721	17.7429	0.0132077
3	8275031	17.7425	0.00887247
3	167945246	17.742	0.00193341
17	39826387	17.7382	0.00206035
6	67492890	17.733	0.00199456
13	20460374	17.7323	0.00257342
12	831805	17.7307	0.00152303
8	52384884	17.7305	0.00167643
17	6335884	17.7296	0.00584215
4	189120911	17.7223	0.0017965
1	80646464	17.7223	0.00160536
5	34528701	17.7187	0.0107516
12	54863630	17.704	0.001704
5	150940377	17.7022	0.00897213
16	61278320	17.686	0.000509169
4	18968826	17.6837	0.0018865
1	186744362	17.6818	0.00161498
1	185692817	17.6778	0.00676395
3	66966911	17.6773	0.00615155
10	126803851	17.6656	0.0080701
4	63084429	17.6519	0.00116223
2	49822013	17.6517	0.000817164
10	22968187	17.6487	0.00224451
4	45689076	17.6477	0.00299209
5	94614527	17.6469	0.000538916
1	7356562	17.6408	0.00401204
10	129538455	17.6377	0.00288653
5	179893370	17.6374	0.00381935
2	41291097	17.6366	0.00375277
10	10956965	17.6364	0.00319888
16	17482044	17.6356	0.00245659
10	93400101	17.6345	0.00128944
12	28347777	17.6321	0.00881705
13	104386898	17.6321	0.00621118
8	127049865	17.6287	0.00274305
21	19249252	17.6234	0.000291145
10	10311458	17.6221	0.00293463
1	237229866	17.6176	0.0112045
13	20460349	17.6173	0.00259159
8	37492361	17.6161	0.00678733
11	126722430	17.614	0.00612178
12	88655551	17.6109	0.00133858
16	64822246	17.6102	0.00307705
7	9915731	17.6068	0.0131403
9	123039275	17.6046	0.00280795
10	50136097	17.6042	0.00120947
21	42578398	17.6021	0.00254462
6	5010061	17.5982	0.00167238
2	24333701	17.5965	0.00178688
4	172143130	17.5963	0.00697098
3	31305813	17.5933	0.0292606
16	17596586	17.5933	0.000419757
12	127261551	17.5799	0.00126539
3	190512973	17.5721	0.00700929
8	74023306	17.5683	0.00559701
7	151619369	17.5646	0.00535338
15	79288182	17.5624	0.0123711
11	123470819	17.559	0.0133863
7	1449429	17.5567	0.00167152
4	154066463	17.5563	0.00471453
6	40302908	17.5558	0.00380895
16	17596220	17.5498	0.000414535
16	22995867	17.5472	0.00399234
2	237526827	17.5468	0.000925464
19	45392254	17.5447	0.00128137
13	65561122	17.5419	0.00969515
5	170521752	17.5414	0.00153155
8	25237801	17.537	0.0199282
16	54766797	17.5301	0.00111039
16	54331216	17.53	0.00105937
9	75427978	17.5261	0.00190631
11	112262196	17.5223	0.00774155
3	128990998	17.5201	0.00102545
9	31992057	17.5181	0.0101175
5	148127642	17.5109	0.00794842
7	140846325	17.5078	0.0043733
11	94659650	17.5001	0.00426322
3	45233185	17.4998	0.014801
5	144396568	17.4982	0.00186006
16	13013854	17.4921	0.00261448
4	92281057	17.4916	0.008371
17	64175460	17.4912	0.0103583
7	131526745	17.4911	0.00630629
13	23795878	17.4898	0.00461457
21	17994316	17.4875	0.00220103
16	15914999	17.4872	0.00251153
17	39829590	17.4837	0.011892
20	41251041	17.4821	0.00608515
13	65561110	17.4805	0.00986247
20	2618783	17.4769	0.00621818
12	54857864	17.4756	0.00183011
17	74123648	17.474	0.000719738
5	117876766	17.4709	0.000792953
4	172832411	17.4694	0.00812841
8	127053114	17.4689	0.00409006
1	98176401	17.4654	0.00272464
9	110898048	17.4652	0.00241601
17	14428563	17.4651	0.00340934
1	98176399	17.4613	0.00272739
6	110356105	17.4602	0.00571979
9	115210894	17.4588	0.00294045
12	54856358	17.4582	0.000928799
5	156443712	17.4567	0.00225766
4	29008799	17.4538	0.0020419
7	31176096	17.4427	0.00774839
8	17423866	17.4426	0.00616836
5	79960849	17.4364	0.00995415
5	101120155	17.4352	0.00114681
12	9722011	17.4351	0.000338488
16	60535704	17.4318	0.00270524
11	112253040	17.4305	0.000781199
3	66966937	17.4305	0.00622925
5	26792775	17.4299	0.00210207
9	91254759	17.4224	0.000857539
3	38344246	17.4212	0.00208655
4	143817124	17.4206	0.00155901
3	131538810	17.4092	0.00444951
16	64820688	17.4091	0.00674725
20	41254693	17.4081	0.00604867
11	94659660	17.4064	0.00426248
11	112261704	17.4041	0.00306284
20	6023390	17.4001	0.000946014
1	215540123	17.3935	0.00171961
3	83913852	17.3906	0.00429387
8	33301917	17.3887	0.0123605
3	17583670	17.3886	0.00215632
13	78352442	17.381	0.00164328
21	21845507	17.3785	0.00301061
6	37334170	17.3773	0.00568436
20	53221238	17.3712	0.00332265
18	47882011	17.3711	0.00541983
2	24583108	17.3701	0.0119113
9	110898052	17.3686	0.00241757
3	17638133	17.3675	0.00121201
5	34528015	17.3646	0.00536564
11	79253944	17.3624	0.00263414
8	37491859	17.3605	0.00581944
12	88698641	17.3603	0.00091659
6	117343696	17.3573	0.00373317
8	127935852	17.355	0.00412797
2	199785212	17.353	0.00161327
3	127632266	17.351	0.0022963
11	20035532	17.3475	0.00118235
2	145987087	17.3466	0.00120154
11	25452633	17.3462	0.00173366
18	4201152	17.3386	0.00546374
6	49311364	17.3368	0.00350209
8	33302051	17.3346	0.00927159
7	9914963	17.3336	0.00452201
7	79428790	17.3321	0.00200902
18	69868853	17.3319	0.00487857
12	19202853	17.3274	0.0048154
8	54521135	17.3231	0.00731428
5	34527883	17.3222	0.00773495
3	17635738	17.3215	0.000937441
2	225273397	17.3203	0.00452731
17	62489423	17.3197	0.00173381
2	187694980	17.3162	0.00283222
13	101283497	17.3157	0.00518661
10	68967438	17.3092	0.00981996
17	62578143	17.3048	0.000897273
7	49172560	17.304	0.00200405
12	88495906	17.3033	0.00237903
4	173458455	17.3031	0.00126622
11	112262187	17.3013	0.00781357
1	186183670	17.3012	0.00368768
16	22974852	17.3011	0.00679267
7	67807506	17.301	0.00353648
16	62720861	17.301	0.00181237
12	73650961	17.3007	0.00675937
9	10666725	17.2992	0.00356398
4	132530770	17.297	0.00190995
11	21730194	17.2943	0.00145629
15	69137998	17.2921	0.00160271
2	158278213	17.288	0.00961898
6	55985119	17.2878	0.00200453
13	33902972	17.286	0.00079504
3	111781467	17.281	0.00542249
18	3183478	17.2785	0.000794346
17	78774765	17.276	0.00522999
16	60539417	17.2759	0.00432016
13	62703145	17.2744	0.00129562
8	17423433	17.2687	0.0091541
4	172149145	17.2678	0.00526043
4	78531932	17.2635	0.00389368
10	13714646	17.2632	0.00309098
7	98802138	17.263	0.00212422
5	79960955	17.2612	0.0123271
12	59465173	17.2603	0.00364799
20	36339870	17.2595	0.0074746
8	74018191	17.2538	0.0120262
6	67914855	17.2518	0.00602485
19	54164584	17.2516	0.00234696
3	96371533	17.2514	0.0026053
2	31502874	17.2496	0.00195903
1	236015717	17.2413	0.000957854
7	140845358	17.2408	0.00317185
12	113363922	17.2395	0.00672518
1	163438834	17.2391	0.00284146
13	25018411	17.2379	0.000557299
2	81844064	17.2285	0.00550929
11	40544509	17.2281	0.0137359
15	47784460	17.2275	0.00148144
16	80688879	17.2272	0.0161432
6	89480826	17.2267	0.00412308
10	82205185	17.2249	0.0052585
3	17500614	17.2212	0.00284024
11	132697663	17.2159	0.0124406
2	213457059	17.2146	0.004608
16	83199425	17.2119	0.00181959
2	199872937	17.2101	0.00215081
20	57436040	17.1986	0.000754854
11	25179448	17.1961	0.00326368
6	75945548	17.1941	0.00577338
1	163438831	17.1926	0.00284201
4	24794104	17.1919	0.00114865
6	55991822	17.1875	0.00128191
4	117522285	17.1852	0.00222551
18	55760765	17.1838	0.0030258
13	38807946	17.1757	0.00273411
8	80013185	17.1748	0.00193485
8	141276724	17.1681	0.0296438
8	17423856	17.1679	0.00626325
7	140237281	17.1626	0.00149144
10	23881074	17.1613	0.000779776
13	53699065	17.1596	0.00243116
1	188856937	17.1565	0.0135127
3	17781766	17.1556	0.00144108
15	88969836	17.1519	0.00934042
13	106132538	17.1508	0.00532524
17	39857835	17.1506	0.00178785
21	17837381	17.1491	0.00375447
1	7352743	17.148	0.00168818
6	56588772	17.1478	0.00268276
1	109739180	17.1453	0.00382466
4	189120984	17.1452	0.00184242
8	28141320	17.1445	0.00574454
16	75497511	17.1413	0.0121229
21	17837722	17.1407	0.00286464
3	17639547	17.1399	0.00162318
8	80021224	17.1371	0.0011819
1	236785797	17.1365	0.00585345
3	183010584	17.136	0.0066087
2	169910628	17.1355	0.00357249
2	71848696	17.1287	0.0164725
18	69868872	17.1286	0.00465671
3	17781799	17.1246	0.00143527
4	25453101	17.1186	0.00597652
19	42767593	17.1186	0.00209968
4	132529141	17.1174	0.00419145
8	105662166	17.1163	0.000689213
15	56071324	17.1099	0.00899334
4	166862290	17.1091	0.0135868
4	53087512	17.109	0.00270989
1	97490949	17.1064	0.00200263
9	132616564	17.1064	0.00570031
4	143885371	17.1042	0.000680199
16	13015716	17.0957	0.00204708
4	137906337	17.0886	0.00403469
1	109463878	17.0885	0.00150118
8	111839763	17.0868	0.0264674
4	176015415	17.0848	0.00291876
21	17846681	17.0806	0.00545454
17	54487098	17.0794	0.00130111
2	213079512	17.0791	0.00194934
4	117522283	17.0782	0.00222547
1	32451343	17.0771	0.00118424
4	172150063	17.0667	0.00922141
3	191260	17.0606	0.00463603
8	72959152	17.0594	0.00426491
8	99155281	17.0573	0.00239923
10	134417434	17.0556	0.00618604
7	108910514	17.0546	0.00190295
10	126802969	17.054	0.00668882
4	172832416	17.0517	0.00838424
5	116519244	17.0486	0.00199814
10	82206018	17.0454	0.00259632
2	159553268	17.0443	0.00230121
18	4232552	17.0439	0.00489764
2	210267784	17.0434	0.00199227
3	26073077	17.0433	0.000596416
15	47784141	17.0413	0.0136889
4	45667803	17.0409	0.0021019
12	49754153	17.04	0.000924121
12	113358106	17.0394	0.00546448
7	42528838	17.0368	0.00223264
3	96372498	17.0343	0.0075584
1	214768136	17.0335	0.00189873
3	21227305	17.0334	0.0139676
18	65592518	17.0309	0.0121849
1	247990932	17.0303	0.00134928
1	236023817	17.0297	0.00182151
1	63371892	17.029	0.00125302
5	127900753	17.0288	0.00120464
12	59467009	17.0279	0.00807765
7	1449220	17.0241	0.00162022
3	45232564	17.0226	0.0126426
12	79134582	17.0173	0.00100555
2	3228958	17.017	0.00300886
10	82205186	17.0093	0.00527235
9	120653775	17.0092	0.00541706
4	153183512	17.0089	0.00401263
13	52950487	17.0077	0.00418272
3	140522258	17.0031	0.00194585
21	21845516	17.0007	0.00302713
6	127502833	17.0007	0.00116158
6	67916839	16.9994	0.0273375
18	27987995	16.998	0.00645209
3	19755462	16.9979	0.00184939
9	32011299	16.9976	0.00586726
2	220562834	16.9956	0.00339982
18	11895216	16.9939	0.00798184
12	28348266	16.9875	0.037553
5	23381606	16.9832	0.00355168
3	19755419	16.983	0.00191368
11	112255757	16.9796	0.00361868
12	127319821	16.9789	0.00407911
1	100748993	16.9748	0.000827681
8	142883316	16.9717	0.00230681
2	81681395	16.9714	0.00171096
2	41218503	16.9703	0.00458195
13	62736520	16.9701	0.00231423
5	1691268	16.9694	0.0029588
7	79508729	16.968	0.00155861
2	41218502	16.9658	0.00457963
7	5769405	16.9646	0.00420463
2	21907597	16.9644	0.000701669
4	143894449	16.9608	0.0100418
19	49085710	16.9598	0.0226718
9	115216951	16.9586	0.00265193
5	152988730	16.9542	0.00718556
18	57955945	16.9529	0.000878203
5	79764238	16.9496	0.00265875
6	117758874	16.9482	0.00347251
7	36074037	16.9469	0.00130562
1	16324667	16.9436	0.0080586
12	59582214	16.9411	0.00453917
12	59550388	16.9368	0.00462287
3	183010645	16.9365	0.0066468
6	89489913	16.9357	0.00388742
4	18968796	16.9303	0.0019025
11	59546169	16.9295	0.00294695
2	229520002	16.9292	0.00146118
7	140255623	16.929	0.00076187
13	62736538	16.9289	0.00231836
4	90749368	16.9273	0.00369618
2	199771910	16.9251	0.00151354
15	50058669	16.9182	0.00320306
12	28347322	16.9174	0.00461736
11	61395249	16.9157	0.00215324
1	101315534	16.9093	0.00089309
10	23860236	16.9082	0.00447934
6	32755275	16.9057	0.025139
4	149639966	16.9008	0.00100267
12	60075303	16.9008	0.00316474
3	17443363	16.9004	0.0028436
8	33301679	16.898	0.0167449
10	23899420	16.8928	0.00851961
6	102605412	16.8891	0.00830996
12	10940595	16.8883	0.0437756
17	63209626	16.8877	0.00355212
5	179890739	16.8875	0.00345689
4	181852811	16.8868	0.00277328
16	60539447	16.886	0.0041306
3	38346186	16.8855	0.0150944
10	66274439	16.8827	0.0097983
6	89480089	16.8825	0.00368077
17	39825488	16.8819	0.0136674
1	16539577	16.8799	0.0014022
12	28331711	16.878	0.00134318
18	4805265	16.8778	0.00774269
2	158960062	16.8766	0.0161958
3	17431545	16.8753	0.00168499
4	55246761	16.8753	0.000676521
10	121859486	16.8752	0.00824846
11	76402935	16.8732	0.00371575
6	53111504	16.8702	0.00248228
8	79095180	16.8683	0.0118688
6	140349702	16.8681	0.00104804
3	17579354	16.8641	0.00283554
4	172150071	16.8631	0.00917231
9	3013123	16.8604	0.0054437
4	139847586	16.858	0.00838571
4	35401976	16.8565	0.00958635
4	59279839	16.8445	0.0293808
3	17443393	16.8444	0.00281135
12	113369177	16.8443	0.00419049
1	236785808	16.8438	0.00575232
7	49173290	16.8431	0.00383812
4	158895468	16.8427	0.0027053
20	41259396	16.8425	0.001676
3	1635485	16.8424	0.00343464
16	8543048	16.8413	0.00335008
12	28345652	16.8411	0.00761426
7	107919170	16.8389	0.0125183
4	177865656	16.8342	0.00287569
16	80681225	16.8334	0.000653391
13	45284897	16.8277	0.00158138
3	25985168	16.8253	0.00251645
5	175154707	16.8218	0.000733141
10	121859384	16.821	0.00812875
9	100497728	16.819	0.00395952
10	68967454	16.8161	0.0101546
13	79438787	16.8159	0.00169885
9	81126458	16.8151	0.0010872
21	21451975	16.8142	0.00509995
4	30148793	16.8125	0.0115496
7	151618811	16.8104	0.0121202
5	124154063	16.8074	0.00308174
13	79270513	16.8061	0.00211491
4	117407994	16.8034	0.005562
1	244987216	16.8027	0.0035885
4	176012449	16.8022	0.00346667
10	134492088	16.7965	0.000940968
7	125359024	16.7962	0.00433653
10	134491980	16.7955	0.000975723
16	54751555	16.7945	0.000279569
19	6015066	16.7904	0.00307123
12	88655438	16.7887	0.00134365
3	111686738	16.7883	0.000554095
8	127056356	16.7858	0.00139276
4	22530016	16.7835	0.0067214
9	125443452	16.781	0.000905447
8	141278904	16.7807	0.0156311
21	16156040	16.7805	0.00278036
6	101123123	16.7799	0.00176752
6	3098358	16.7785	0.000354612
3	84514022	16.7748	0.00474874
19	50042829	16.7736	0.00378754
2	81739128	16.7694	0.00257821
3	177463999	16.7659	0.0012354
10	134417449	16.7628	0.00625527
8	67393613	16.7626	0.0014941
21	20301684	16.7616	0.00562061
7	48717414	16.76	0.00823602
1	62488522	16.7562	0.00346257
9	123036295	16.7554	0.00386987
12	105773446	16.7549	0.00307498
9	7298230	16.7542	0.00211864
7	98799069	16.7536	0.00645293
1	247347045	16.7516	0.00261686
1	236166144	16.7513	0.0139842
1	66908612	16.751	0.0027602
10	90409769	16.7505	0.00832526
21	27952079	16.748	0.00428109
3	17317244	16.7471	0.000827064
8	120233968	16.7432	0.00291687
5	127928132	16.7334	0.00301295
3	7947484	16.7333	0.0119074
20	4440351	16.7332	0.0102985
12	88655644	16.7325	0.00135366
2	18676750	16.7324	0.00992002
5	103597321	16.7322	0.00151641
21	42586604	16.7311	0.00115427
5	162638070	16.7302	0.00733176
17	39829290	16.7295	0.00511647
1	165611527	16.7279	0.00668225
20	53738000	16.7252	0.00090652
2	40128891	16.7238	0.00437641
4	6056406	16.7231	0.00112443
9	97346979	16.7196	0.00536433
5	82211655	16.7159	0.00348904
12	3848767	16.7125	0.00281932
2	107815562	16.7112	0.00269397
3	111787576	16.7079	0.00442393
7	157899028	16.7027	0.00140103
7	98811303	16.7026	0.000511407
13	101173401	16.7026	0.000754607
4	166868507	16.7019	0.000917532
12	28362928	16.7002	0.0138927
1	37880709	16.6997	0.00571701
4	117371116	16.6986	0.000408094
19	54164569	16.692	0.00235131
3	191245	16.6899	0.00481586
5	103617046	16.6861	0.00102479
13	41497403	16.6797	0.00772946
1	235004468	16.6761	0.00662626
4	172137331	16.6739	0.00211996
6	85883597	16.6737	0.00578948
8	127835290	16.6724	0.00530168
3	21229103	16.6721	0.00279977
12	24891769	16.6712	0.00427664
2	206263343	16.6696	0.00119201
16	75497513	16.6683	0.012069
15	42652099	16.6679	0.00608521
3	190363877	16.6662	0.00309284
2	225753342	16.6597	0.00127739
7	108885892	16.6573	0.00374171
5	26392432	16.6564	0.00381161
11	40544821	16.6563	0.016071
5	9991767	16.6524	0.00449607
2	231006035	16.6516	0.00544819
2	237539217	16.6447	0.00296947
5	148133858	16.6438	0.0010366
4	6154110	16.6424	0.00494821
2	210267936	16.6422	0.00210895
4	135235754	16.6413	0.000527325
5	4476090	16.6397	0.00256425
3	96371813	16.639	0.0157507
17	39829302	16.6385	0.0051458
1	59092182	16.6357	0.0154399
19	50044339	16.6347	0.00930106
2	232562274	16.6324	0.00398673
8	127045474	16.6301	0.000800919
2	121254949	16.6222	0.00268875
6	73217629	16.6179	0.00325325
10	17762105	16.6179	0.00153067
11	59525741	16.6159	0.000992392
7	42593422	16.6158	0.00503916
12	8805087	16.6146	0.0018643
16	75497504	16.6145	0.0113194
17	78776597	16.6108	0.00721248
11	25186579	16.6098	0.00286533
4	30149090	16.6088	0.00507598
6	89382927	16.6026	0.00442902
10	82209807	16.6025	0.000811765
13	38825898	16.6012	0.00297168
11	40544820	16.5988	0.016245
7	108885879	16.5978	0.00383631
12	3167680	16.5973	0.00145687
7	42593429	16.5968	0.00505668
12	72352986	16.5913	0.00111501
7	151619394	16.5898	0.00448096
9	10659173	16.5888	0.00560992
4	30149089	16.5845	0.00507135
11	24855153	16.5841	0.00330022
18	71930734	16.5798	0.0270878
1	245727700	16.5781	0.00844625
4	168536736	16.5729	0.00653841
3	111786347	16.5699	0.00317628
4	104400463	16.5643	0.000590963
3	175277689	16.5628	0.00397135
12	98704195	16.5603	0.0043057
13	19934027	16.5598	0.0193115
9	115215954	16.555	0.00597579
4	143822343	16.5429	0.00142355
8	57172232	16.5417	0.00360499
11	59527674	16.5403	0.00112021
1	224473849	16.54	0.000866613
3	49099435	16.5397	0.00183899
12	76482845	16.5391	0.000731261
6	129196373	16.539	0.0025911
15	96585367	16.5372	0.0148009
5	79940605	16.5359	0.00223391
4	173457620	16.5329	0.00185136
7	29717390	16.5303	0.000114009
10	13484038	16.5261	0.0107624
13	25027897	16.5235	0.00782361
5	116662355	16.5181	0.00766717
2	72302711	16.5153	0.00425928
4	6948842	16.513	0.00215302
7	28413187	16.5119	0.00326649
19	49544362	16.5117	0.00135849
1	235031778	16.5076	0.0111111
4	150065549	16.5051	0.000441416
8	129532469	16.5051	0.00873731
9	132616547	16.5025	0.0059049
6	70303832	16.4986	0.00823593
19	53683618	16.4978	0.0189798
11	112252219	16.4973	0.00594668
3	191361035	16.4945	0.00493411
3	133733901	16.4914	0.0161339
8	141276728	16.4904	0.0313761
13	70051049	16.489	0.00412646
6	67915802	16.4884	0.00505281
3	133733900	16.4883	0.0160584
19	50044875	16.4881	0.00279938
18	8828165	16.4839	0.00636626
20	41229859	16.4815	0.00676523
9	100497750	16.4794	0.00394787
6	5042052	16.4793	0.01408
5	127920535	16.4751	0.0049104
2	228463768	16.4713	0.0398854
15	87742260	16.4692	0.00248373
12	28331694	16.469	0.00135254
2	141212126	16.4681	0.000973908
17	79992139	16.4656	0.00711948
8	20586559	16.4647	0.00368933
3	49241355	16.4546	0.00082796
15	59396977	16.4503	0.00165759
15	36312543	16.4499	0.000931202
9	75411898	16.4458	0.00213694
4	117337709	16.4443	0.00249136
7	136468261	16.4399	0.00126842
3	140521299	16.439	0.00671292
3	105991033	16.4337	0.00127741
11	20721759	16.4333	0.00980676
1	119844431	16.429	0.000796277
1	214874967	16.4269	0.00675496
2	170012964	16.4257	0.000789601
3	45235246	16.4243	0.00493218
5	23380517	16.4242	0.0254075
7	66029056	16.4199	0.0394823
12	50043884	16.4194	0.000323921
16	23224416	16.4192	0.00260041
6	5018176	16.4188	0.0050861
20	41253498	16.4165	0.00356404
1	80629532	16.4151	0.00047303
3	37799173	16.4149	0.00164676
3	17787557	16.4118	0.00198803
3	122884580	16.4106	0.0153351
11	100640587	16.4079	0.00306155
2	35976473	16.4033	0.00187735
7	140367456	16.4014	0.00258526
1	238241606	16.3983	0.00902595
1	41762935	16.3979	0.00296453
2	24592863	16.3953	0.0215729
6	73228407	16.3877	0.00369286
9	26018745	16.3815	0.00712704
6	129234080	16.3809	0.000582769
13	62737307	16.3809	0.00474165
11	21735291	16.3795	0.00376971
2	169913887	16.3783	0.00302525
18	27977090	16.3766	0.0176059
8	23437107	16.3763	0.0147442
9	24028971	16.3744	0.00636664
13	19924359	16.3734	0.00315021
4	21790829	16.3663	0.0147842
15	70930497	16.3648	0.000324349
6	74849280	16.3641	0.00234227
10	23899820	16.3632	0.00829644
6	16994663	16.3617	0.00284238
4	143822502	16.3615	0.00157438
5	150939818	16.3568	0.0120151
16	80718667	16.3559	0.00848346
3	175277628	16.3556	0.00414545
17	14429258	16.3503	0.00665156
8	80014514	16.347	0.0025808
1	41770620	16.3456	0.00355278
1	73680845	16.3452	0.00320886
6	89431508	16.3439	0.00153217
8	82510790	16.3417	0.00249765
13	91748928	16.3409	0.00203062
3	111695911	16.3361	0.00370036
2	40132703	16.3347	0.00123423
4	26569832	16.3321	0.00338326
18	63392511	16.3311	0.0138338
5	124183214	16.3298	0.00216604
13	38822197	16.3294	0.00293132
5	6211615	16.3268	0.0105705
7	29023092	16.3264	0.0136551
13	92881710	16.3242	0.00377496
7	153235411	16.3113	0.00338983
17	79992138	16.3108	0.00703714
8	82517891	16.3092	0.00614441
4	63097403	16.3073	0.00922795
17	79992140	16.3072	0.00712586
20	43783761	16.305	0.00148595
12	32837310	16.3028	0.00147337
2	187696736	16.3	0.00546297
2	178431582	16.2985	0.00422374
16	13013874	16.2973	0.0026162
4	18965803	16.2944	0.00602465
1	27498746	16.2929	0.00318505
1	238264117	16.2898	0.0105329
16	8548902	16.2889	0.0243043
3	38342341	16.2882	0.00942077
17	39829103	16.2881	0.00695525
13	92882627	16.2858	0.00673728
4	117323120	16.2806	0.00273541
6	162218041	16.2803	0.000593885
2	17787556	16.2793	0.00479146
8	72959205	16.2771	0.00439356
7	144887701	16.2757	0.00275397
6	165799958	16.2755	0.0200554
6	44497558	16.2746	0.00546587
2	71464128	16.2742	0.00217207
3	82951862	16.2739	0.00397108
16	33446440	16.2738	0.00233861
6	56588155	16.2721	0.00561535
6	55996576	16.2702	0.002456
6	102715629	16.2693	0.00959337
2	81844125	16.2692	0.00654878
12	44473635	16.2691	0.00202213
6	66535607	16.2657	0.00360798
10	59745883	16.264	0.00163332
6	55987863	16.2612	0.0169727
14	97707306	16.2594	0.00129716
2	178431537	16.2573	0.00435681
11	59519395	16.2548	0.00537634
8	6410572	16.2533	0.00720972
13	79270468	16.2517	0.00220118
1	16323931	16.2437	0.026032
8	54500503	16.241	0.00666203
1	239035952	16.2335	0.00398847
6	129134815	16.232	0.0010601
4	187739764	16.2295	0.00113427
3	135521809	16.2288	0.00136682
20	44199522	16.2287	0.00320141
4	6056129	16.2285	0.00108681
7	21302835	16.2272	0.00112259
13	65542385	16.2223	0.00978801
6	67914107	16.2215	0.0020114
10	59743706	16.2178	0.0238028
2	24590175	16.2166	0.0126869
13	40187765	16.2151	0.00725169
10	11107652	16.2133	0.00213032
1	171264130	16.2116	0.00804427
6	55988062	16.2111	0.0267296
4	169121201	16.2042	0.00210607
15	83959242	16.2033	0.00152652
13	20462082	16.2033	0.00177169
12	18130394	16.202	0.00214143
10	8218663	16.1987	0.0051357
13	25068246	16.1987	0.00237243
1	27477976	16.1979	0.00204128
6	150663534	16.1936	0.00319659
2	3612429	16.1924	0.0311124
16	12880446	16.1895	0.00195058
9	14295497	16.1864	0.00705163
10	72838667	16.1858	0.001027
13	23795093	16.1858	0.0119083
2	214023810	16.1857	0.00373514
6	89470291	16.1829	0.00618822
11	42014029	16.1816	0.00367071
18	65593122	16.1806	0.00481227
8	57172272	16.1799	0.00366593
7	38385822	16.1794	0.00888357
7	140264703	16.1776	0.00766264
10	62737256	16.1759	0.00381689
17	39829942	16.1759	0.00829302
15	69137944	16.1759	0.00162177
4	18965691	16.1724	0.00545572
20	453871	16.1713	0.00279034
2	124665789	16.171	0.00152298
7	48721551	16.1682	0.00414634
7	9918224	16.1678	0.00208608
19	49208564	16.1676	0.00500351
8	58297028	16.1655	0.00173101
3	96371524	16.1652	0.0026104
5	1691306	16.1639	0.00299914
13	52953607	16.1625	0.0010707
2	21893956	16.162	0.00160717
7	79508802	16.1605	0.00144948
6	67916743	16.16	0.00635593
13	79259685	16.1594	0.00474779
13	19925801	16.1592	0.00448147
13	52939421	16.1586	0.00172283
13	79259684	16.1563	0.00474679
4	166862361	16.1558	0.0185077
5	26803729	16.1552	0.00345684
4	143810569	16.1499	0.00630821
1	233328924	16.1476	0.00234506
11	40566988	16.1442	0.00349548
6	40330045	16.1441	0.00321686
1	9279011	16.1438	0.00955434
2	34960706	16.1422	0.00275016
18	69867079	16.142	0.0034276
10	23863007	16.1411	0.00365554
19	50045205	16.1386	0.00687505
1	91478995	16.1371	0.00141502
2	21898216	16.1366	0.00261231
3	186888795	16.1366	0.00890988
6	154372692	16.1352	0.001156
6	127509828	16.1348	0.00245104
2	228463839	16.1344	0.0811609
1	186753848	16.1343	0.000533927
[truncated: 277,419+ more rows]

## Sheet: supplementary file 1c
EPAS1 gene
Chromosome	Top 5% SNPs Position	Distance (bp) between SNPs	LR statistic	α	(-)log (α)	Average LR value
2	46479107	NA	7.96336	0.00552763	2.25746	7.35166
2	46489474	10367	5.93982	0.00447478	2.34923
2	46501270	11796	6.204	4.3931	-0.642771
2	46502071	801	7.00464	0.00795671	2.09927
2	46502575	504	11.3015	0.0624789	1.20427
2	46502647	72	9.4717	0.00798168	2.09791
2	46507941	5294	6.67586	0.00349099	2.45705
2	46511939	3998	6.204	4.39309	-0.64277
2	46579348	67409	6.204	4.3931	-0.642771
2	46579658	310	6.204	4.3931	-0.642771
2	46587034	7376	6.204	4.3931	-0.642771
2	46597296	10262	7.33162	0.00315535	2.50095
2	46598233	937	9.62609	0.00397862	2.40027
2	46599373	1140	5.52985	7.29634	-0.863105
2	46625608	26235	6.204	4.3931	-0.642771
2	46633478	7870	6.204	4.39309	-0.642771
2	46638939	5461	10.7738	0.000909209	3.04134
2	46648250	9311	7.74223	0.0154464	1.81117
2	46655245	6995	6.89304	0.00716041	2.14506

## Sheet: supplementary file 1d
EGLN1 gene
Chromosome	Top 5% SNPs Position	Distance (bp) between SNPs	LR statistic	α	(-)log (α)	Average LR value
1	NA	231513739	9.53001	0.00214592	2.66839	6.89736
1	16449	231530188	5.50769	7.25037	-0.86036
1	36454	231566642	5.65437	0.0130277	1.88513

## Sheet: supplementary file 1e
Associated genes to top 5% LR values	Hu et al., 2017	Zhang et al., 2021	Browning et al. 2018
EPAS1*	√	√
SKAP2	√
PRKCE	√	√
MSH2	√
CCDC127	√
SDHA	√
MFAP5	√
RIMKLB	√
A2ML1	√
MIRLET7BHG	√	√
PPARA	√
TBC1D1			√
PRKAG2	√
KRAS	√		√

## Sheet: supplementary file 1f
Pathways	HHS Size	HSS Score	P-Value	Subnetwork genes
Chemokine signaling pathway	2	6.5466	0.0173587	CXCR2, PLCB1
Pathways in cancer*	5	6.41223	0.0206916	DAPK1, EPAS1*, FOS, MAPK1 (ERK), VEGFA
Ras signaling pathway	5	5.71218	0.0376337	GNG7, KRAS, RASGRF2, RASGRP2, RASSF1
Purine metabolism	4	5.39203	0.0486044	AK5, AK7, AK9, GUCY1A1
Platelet activation	2	5.21301	0.0566588	PLA2G4E, RASGRP2
AMPK signaling pathway	2	5.16115	0.058603	TBC1D1, PRKAG2
